# **Utilizing Natural Language Processing and Large Language Models in the Diagnosis and Prediction of Infectious Diseases: A Systematic Review**

Mahmud Omar<sup>1</sup>, Dana Brin<sup>2</sup>, Benjamin Glicksberg<sup>3,4</sup>, Eyal Klang<sup>4</sup>

<sup>1</sup> Tel-aviv university, Faculty of medicine.

<sup>2</sup> Division of Diagnostic Imaging, Sheba Medical Center, Affiliated to Tel-Aviv  
University

<sup>3</sup> Hasso Plattner Institute for Digital Health at Mount Sinai, Icahn School of Medicine  
at Mount Sinai, New York, NY, USA

<sup>4</sup> The Division of Data-Driven and Digital Medicine (D3M), Icahn School of  
Medicine at Mount Sinai, New York, NY, USA

**Acknowledgment** – none

**Financial disclosure** – none

## **Corresponding author:**

Mahmud Omar

Tel-aviv university, Faculty of medicine

Tel: 972-0586318191; E-mail: Mahmudomar70@gmail.com

## **Abstract**

**Background:** Natural Language Processing (NLP) and Large Language Models (LLMs) hold largely untapped potential in infectious disease management. This review explores their current use and uncovers areas needing more attention.

**Methods:** This analysis followed systematic review procedures, registered with PROSPERO. We conducted a search across major databases including PubMed, Embase, Web of Science, and Scopus, up to December 2023, using keywords related to NLP, LLM, and infectious diseases. We also employed the QUADAS-2 tool for evaluating the quality and robustness of the included studies.

**Results:** Our review identified 15 studies with diverse applications of NLP in infectious disease management. Notable examples include GPT-4's application in detecting urinary tract infections and BERTweet's use in Lyme Disease surveillance through social media analysis. These models demonstrated effective disease monitoring and public health tracking capabilities. However, the effectiveness varied across studies. For instance, while some NLP tools showed high accuracy in pneumonia detection and high sensitivity in identifying invasive mold diseases from medical reports, others fell short in areas like bloodstream infection management.

**Conclusion:** This review highlights the yet-to-be-fully-realized promise of NLP and LLMs in infectious disease management. It calls for more exploration to fully harness AI's capabilities, particularly in the areas of diagnosis, surveillance, predicting disease courses, and tracking epidemiological trends.

## **Introduction**

Artificial Intelligence (AI) marks a significant shift in streamlining medical tasks and enhancing the management of large health data, with promising implications for public health (1–3). In managing infectious diseases, a field marked by complex epidemiological and clinical challenges, AI's potential role is notably significant (4–6).

Natural Language Processing (NLP) and generative-AI Large Language Models (LLM) are emerging as crucial yet underexplored tools in this domain (7–9). These algorithms excel at analyzing and generating text in a human-like manner, an essential capability for interpreting intricate clinical data (8–12).

The current landscape in the literature shows a mixed picture. While there are studies demonstrating AI's potential to innovate in diagnosis and treatment planning, there is also a noticeable fragmentation in research efforts (2,4,5,10,13,14). This scenario points to both the achievements and the overlooked possibilities in AI applications, especially in the field of infectious diseases.

Our research focuses on exploring the current use of NLP and LLM in the field of infectious diseases, aiming to uncover areas where further exploration could significantly enhance diagnosis and prediction capabilities.

## **Methods**

### *Search Strategy*

This systematic review was registered with the International Prospective Register of Systematic Reviews - PROSPERO (Registration code: CRD42023494253). We adhered to the Preferred Reporting Items for Systematic Reviews and Meta-Analyses (PRISMA) guidelines (15,16).

A systematic search was conducted across key databases: PubMed, Embase, Web of Science, and Scopus, up until December 2023. We complemented the search via reference screening for any additional papers.

We aimed to identify original research articles that investigated the application of NLP and LLM in the diagnosis or prediction of infectious diseases.

The search utilized a combination of keywords including "infectious diseases", "infection", "LLM", "Large Language Mode", "AI", "Artificial Intelligence", "natural language processing", and "NLP". Specific search strings for each database are detailed in the supplementary materials.

### *Study Selection*

We included original research articles that focused on the application of NLP and LLM in diagnosing or predicting infectious diseases.

Studies were selected if they provided data for assessing the performance metrics of AI models, such as area under the curve, accuracy, sensitivity, and specificity.

We excluded review papers, case reports, conference abstracts, editorials, preprints, and studies not conducted in English. We also excluded studies employing classic machine-learning techniques unrelated to NLP.

### *Data Extraction*

Two independent reviewers extracted relevant information using a standardized form. Data points included the first author's name, year of publication, study design, sample size, specific conversational NLP techniques used, dataset details for model training and validation, performance metrics, and key findings. Discrepancies between reviewers were resolved through discussion, and a third reviewer was consulted when necessary.

### *Risk of Bias*

To evaluate the quality and robustness of the methodologies in the included studies, the QUADAS-2 (Quality Assessment of Diagnostic Accuracy Studies-2) tool was used (17).

## **Results**

### *Natural Language Processing (NLP) and Generative AI Models*

Natural Language Processing (NLP), a vital part of AI, enables machines to understand and interpret human language text (7). Within this domain, generative AI models, especially Large Language Models (LLMs), are gaining prominence (10,18). These models are designed to generate text that closely resembles human writing, providing valuable insights and applications.

Among the notable LLMs are Bidirectional Encoder Representations from Transformers (BERT) and Generative Pre-trained Transformers (GPT). BERT is particularly effective at grasping the context within language, allowing for more accurate interpretations of text (19). On the other hand, GPT stands out for its ability

to produce text that is remarkably similar to human-generated content, a feature that has broad applications in various fields including healthcare (20).

Together, NLP and these advanced generative models are reshaping how we interact with and utilize language data in the AI sphere, opening new avenues for research and application (**Figures 1 and 2**).

### *Search Results and Study Selection*

Our search yielded a total of 432 articles. Specifically, the search resulted in 177 articles from PubMed, 52 from Embase, 68 from Web of Science, and 135 from Scopus.

After the removal of 143 duplicates, the screening process found 13 studies that met our inclusion and exclusion criteria (19,21–32). We identified two additional studies via reference screening (33,34).

These studies varied in their disease focus, underscoring the diverse applications of NLP and LLM in the field of infectious diseases.

The process of study selection and the screening methodology are detailed in the PRISMA flow chart (**Figure 3**).

### *Risk of Bias*

Six studies demonstrated a low risk of bias across all domains (21,31–35). Overall, ten studies were evaluated as having low risk (21–23,26,28,31–35), four showed high risk (19,24,27,29), and one lacked sufficient data for a conclusive risk assessment (30).

Generally, the studies indicated a predominantly low risk of bias, suggesting reliable and valid results (**Figures 4-5**). Concerning applicability, most of the studies

demonstrated a low risk. However, specific concerns were raised in a few studies, particularly regarding their study populations. Several studies used specialized populations, such as patients with hematologic neoplasms or data derived from specific databases, which may limit generalizability (25–29,35).

#### *Overview of Included Studies*

The included studies were published between 2005 and 2023 and present a comprehensive view of the evolving use of NLP and LLM in diagnosing and managing infectious diseases. The studies focused on various diseases, including fungal infections in immunocompromised patients, respiratory infections in newborns, HIV, Lyme disease, and COVID-19. These studies utilized different data sources such as radiology and histopathology reports, clinical data from medical files, and social media posts (e.g., tweets). Notably, two studies tested ChatGPT-4, two studies utilized BERT, while others employed a variety of NLP models. This showcases the evolving landscape of AI applications in infectious diseases.

Notably, Maillard et al. and Perret and Schmid et al. utilized GPT-4 to analyze bloodstream infections and catheter-associated urinary tract infections, respectively (31,35). They demonstrated the potential of AI in clinical decision-making despite certain limitations.

Baggio et al. and Ananda-Rajah et al. employed machine learning-based NLP to enhance the surveillance of invasive mold diseases (22,27,30).

Additionally, studies like Feller et al. and Boligarla et al. explored innovative applications of NLP in risk assessment and disease surveillance using diverse data sources, including clinical notes and social media (25,26).

These studies collectively underscore the significant advancements and potential of NLP in infectious disease research, while also highlighting areas for improvement and further exploration (**Table 1**).

### *Narrative Synthesis of AI and NLP in Infectious Diseases*

#### **Diagnosis and patient management**

In comparing the effectiveness of NLP and LLM in infectious disease management, the results show varied outcomes. GPT-4, as used in Maillard et al.'s and Perret and Schmid et al.'s studies (31,35), demonstrated high accuracy in catheter-associated urinary tract infections (CAUTI) detection. However, the model showed moderated effectiveness in bloodstream infection management.

NLP algorithms in the studies by Branch-Elliman et al. and Sanger et al. showed high sensitivity and specificity for CAUTI detection (33,34). This indicates their strong potential for precise medical surveillance and diagnosis.

#### **NLP in Disease Monitoring from Medical Reports**

NLP demonstrated high effectiveness in pneumonia and invasive mold disease detection. For instance, the MedLEE model achieved up to 99% specificity in pneumonia detection (28). In Baggio et al, an NLP classifier showed 91% sensitivity in identifying invasive mold diseases from CT reports (30). These results underline NLP's promising role in disease surveillance.

#### **Public Health Surveillance**

Several studies revealed NLP's effectiveness in health monitoring.

For example, BERTweet model was used for Lyme Disease detection through social media tweets (25). BERTweet, analyzing 1.3 million tweets, reached 90% accuracy.



The eCOV model was used for COVID-19 electronic health records (EHR) messages (32). eCOV's classification scored a 94% macro F1.

### **Prediction and Risk Assessment**

NLP models have shown advancements in infectious disease risk assessment.

For example, an HIV risk assessment model achieved an F1 score of 0.74, demonstrating NLP's capability in extracting vital clinical data (29).

Another model, CHESS, used in detecting infectious disease symptoms in primary care records, achieved high precision and recall (21).

These results highlights NLP's efficiency in predictive analytics from varied clinical data sources.

### **Key Summary of LLM and NLP in Infectious Disease Research:**

1. **Public Health Surveillance:** Tools like BERTweet are effective in tracking disease epidemiology through social media analysis.
2. **Diagnostic Accuracy:** NLP shows high accuracy in disease detection from medical reports. This could be helpful for incidence monitoring and for aiding diagnoses (**Table 2**).
3. **Clinical Applications:** NLP and LLM have versatile use cases: disease monitoring, risk assessment, pandemic prevention, and prediction, and aiding clinical decisions (**Table 3**).

## **Discussion**

The integration of NLP and LLM in the management of infectious diseases holds the promise for a paradigm shift in medical diagnostics and public health surveillance (20,36–39). Our systematic review reveals a landscape where the potential of these technologies is only beginning to be tapped.

Firstly, the implementation of NLP and LLM in infectious diseases showcases a leap forward in medical technology's ability to process and interpret complex clinical data (1,2,36,37). The precision in disease detection, as illustrated by studies on CAUTI and pneumonia, underscores the capability of AI to augment human expertise in diagnostic processes (23,24,33–35). However, the variation in effectiveness across different infectious diseases highlights the nuanced nature of AI applications in healthcare. For instance, a study by Wilhelm et al. on various Conversational AI models across different medical specialties like ophthalmology, orthopedics, and dermatology, found significant differences in the quality and safety of the medical advice provided (40). Furthermore, research by Maillard and colleagues revealed that GPT-4 occasionally produces incorrect and, at times, detrimental medical guidance and treatment strategies (31). It is not a one-size-fits-all solution but requires tailored approaches depending on the disease context.

Secondly, the use of AI in public health surveillance, as evidenced by the BERTweet model for Lyme Disease and the eCOV model for COVID-19, is a breakthrough (19,24,32). These tools demonstrate how AI can transform unstructured data from diverse sources into actionable insights, a critical advancement for early outbreak detection and response.

Thirdly, the evolution of AI in risk assessment and predictive analytics marks a significant stride. Models like the HIV risk assessment tool and CHESS show that

AI can efficiently sift through vast clinical data, extracting crucial information that can inform patient care and disease management (21,26).

However, this promising landscape is not without its challenges. The variability in study methodologies and the limited focus of some studies on specific patient populations or diseases indicate that generalizability remains a concern. The dependency on the quality and completeness of clinical data for AI models underscores the need for robust data infrastructure in healthcare settings. For example, a lack of contextual awareness and inherent biases may sometimes hinder AI safe deployment in clinical settings, as reported by Schwartz et al (5).

Furthermore, the nascent stage of LLM application in infectious diseases, as seen in the limited number of studies, suggests that we are only scratching the surface of what these technologies can achieve (10,20,36).

### *Limitations*

Our study faces several limitations. The emerging nature of LLM in healthcare research means that there are relatively few studies specifically focusing on this technology, limiting our ability to draw comprehensive conclusions. The immense potential of LLM necessitates more extensive research to fully understand its capabilities and limitations. Additionally, the predominance of retrospective studies in our review indicates a need for more prospective studies to validate the findings (41). Lastly, the diverse methodologies and focus areas of the included studies prevented us from performing a meta-analysis, highlighting the need for more standardized research approaches in this field.

### *Conclusion*

This review highlights the yet-to-be-fully-realized promise of NLP and LLMs in

infectious disease management. It calls for more exploration to fully harness AI's capabilities, particularly in the areas of diagnosis, surveillance, predicting disease courses, and tracking epidemiological trends.

## References

1. Davenport T, Kalakota R. The potential for artificial intelligence in healthcare. *Future Healthc J.* 2019 Jun;6(2):94–8.
2. Bajwa J, Munir U, Nori A, Williams B. Artificial intelligence in healthcare: transforming the practice of medicine. *Future Healthc J.* 2021 Jul 16;8(2):e188–94.
3. Beam AL, Drazen JM, Kohane IS, Leong TY, Manrai AK, Rubin EJ. Artificial Intelligence in Medicine. *New England Journal of Medicine.* 2023 Mar 30;388(13):1220–1.

4. Kaneda Y. ChatGPT in infectious diseases: A practical evaluation and future considerations. *New Microbes New Infect.* 2023 Sep;54:101166.
5. Schwartz IS, Link KE, Daneshjou R, Cortés-Penfield N. Black Box Warning: Large Language Models and the Future of Infectious Diseases Consultation. *Clinical Infectious Diseases.* 2023 Nov 16;
6. Siddig EE, Eltigani HF, Ahmed A. The Rise of AI: How Artificial Intelligence is Revolutionizing Infectious Disease Control. *Ann Biomed Eng.* 2023 Dec 19;51(12):2636–7.
7. Nadkarni PM, Ohno-Machado L, Chapman WW. Natural language processing: an introduction. *Journal of the American Medical Informatics Association.* 2011 Sep 1;18(5):544–51.
8. Chary M, Parikh S, Manini A, Boyer E, Radeous M. A Review of Natural Language Processing in Medical Education. *Western Journal of Emergency Medicine.* 2018 Dec 12;20(1):78–86.
9. Gottlieb M, Kline JA, Schneider AJ, Coates WC. ChatGPT and conversational artificial intelligence: Friend, foe, or future of research? *Am J Emerg Med.* 2023 Aug;70:81–3.
10. Rajpurkar P, Chen E, Banerjee O, Topol EJ. AI in health and medicine. *Nat Med.* 2022 Jan 20;28(1):31–8.
11. Sorin V, Barash Y, Konen E, Klang E. Deep-learning natural language processing for oncological applications. *Lancet Oncol.* 2020 Dec;21(12):1553–6.
12. Sorin V, Barash Y, Konen E, Klang E. Deep Learning for Natural Language Processing in Radiology—Fundamentals and a Systematic Review. *Journal of the American College of Radiology.* 2020 May;17(5):639–48.
13. Parums D V. Editorial: Infectious Disease Surveillance Using Artificial Intelligence (AI) and its Role in Epidemic and Pandemic Preparedness. *Medical Science Monitor.* 2023 Jun 1;29.
14. Wong F, de la Fuente-Nunez C, Collins JJ. Leveraging artificial intelligence in the fight against infectious diseases. *Science (1979).* 2023 Jul 14;381(6654):164–70.
15. Page MJ, McKenzie JE, Bossuyt PM, Boutron I, Hoffmann TC, Mulrow CD, et al. The PRISMA 2020 statement: an updated guideline for reporting systematic reviews. *BMJ.* 2021 Mar 29;n71.

16. Schiavo JH. PROSPERO: An International Register of Systematic Review Protocols. *Med Ref Serv Q*. 2019 Apr 3;38(2):171–80.
17. Whiting PF. QUADAS-2: A Revised Tool for the Quality Assessment of Diagnostic Accuracy Studies. *Ann Intern Med*. 2011 Oct 18;155(8):529.
18. Sorin V, Klang E, Sklair-Levy M, Cohen I, Zippel DB, Balint Lahat N, et al. Large language model (ChatGPT) as a support tool for breast tumor board. *NPJ Breast Cancer*. 2023 May 30;9(1):44.
19. Boligarla S, Laison EKE, Li J, Mahadevan R, Ng A, Lin Y, et al. Leveraging machine learning approaches for predicting potential Lyme disease cases and incidence rates in the United States using Twitter. *BMC Med Inform Decis Mak*. 2023 Oct 16;23(1):217.
20. Dave T, Athaluri SA, Singh S. ChatGPT in medicine: an overview of its applications, advantages, limitations, future prospects, and ethical considerations. *Front Artif Intell*. 2023 May 4;6.
21. Hardjojo A, Gunachandran A, Pang L, Abdullah MR Bin, Wah W, Chong JWC, et al. Validation of a Natural Language Processing Algorithm for Detecting Infectious Disease Symptoms in Primary Care Electronic Medical Records in Singapore. *JMIR Med Inform*. 2018 Jun 15;6(2):e36.
22. Ananda-Rajah MR, Bergmeir C, Petitjean F, Slavin MA, Thursky KA, Webb GI. Toward Electronic Surveillance of Invasive Mold Diseases in Hematology-Oncology Patients: An Expert System Combining Natural Language Processing of Chest Computed Tomography Reports, Microbiology, and Antifungal Drug Data. *JCO Clin Cancer Inform*. 2017 Nov;(1):1–10.
23. Elkin PL, Froehling D, Wahner-Roedler D, Trusko B, Welsh G, Ma H, et al. NLP-based identification of pneumonia cases from free-text radiological reports. *AMIA Annu Symp Proc*. 2008 Nov 6;2008:172–6.
24. Cury RC, Megyeri I, Lindsey T, Macedo R, Batlle J, Kim S, et al. Natural Language Processing and Machine Learning for Detection of Respiratory Illness by Chest CT Imaging and Tracking of COVID-19 Pandemic in the United States. *Radiol Cardiothorac Imaging*. 2021 Feb 1;3(1):e200596.
25. Boligarla S, Laison EKE, Li J, Mahadevan R, Ng A, Lin Y, et al. Leveraging machine learning approaches for predicting potential Lyme disease cases and incidence rates in the United States using Twitter. *BMC Med Inform Decis Mak*. 2023 Oct 16;23(1):217.

26. Feller DJ, Zucker J, Yin MT, Gordon P, Elhadad N. Using Clinical Notes and Natural Language Processing for Automated HIV Risk Assessment. *JAIDS Journal of Acquired Immune Deficiency Syndromes*. 2018 Feb 1;77(2):160–6.
27. Ananda-Rajah MR, Martinez D, Slavin MA, Cavedon L, Dooley M, Cheng A, et al. Facilitating Surveillance of Pulmonary Invasive Mold Diseases in Patients with Haematological Malignancies by Screening Computed Tomography Reports Using Natural Language Processing. *PLoS One*. 2014 Sep 24;9(9):e107797.
28. Mendonça EA, Haas J, Shagina L, Larson E, Friedman C. Extracting information on pneumonia in infants using natural language processing of radiology reports. *J Biomed Inform*. 2005 Aug;38(4):314–21.
29. Rozova V, Khanina A, Teng JC, Teh JSK, Worth LJ, Slavin MA, et al. Detecting evidence of invasive fungal infections in cytology and histopathology reports enriched with concept-level annotations. *J Biomed Inform*. 2023 Mar;139:104293.
30. Baggio D, Peel T, Peleg AY, Avery S, Prayaga M, Foo M, et al. Closing the Gap in Surveillance and Audit of Invasive Mold Diseases for Antifungal Stewardship Using Machine Learning. *J Clin Med*. 2019 Sep 5;8(9):1390.
31. Maillard A, Micheli G, Lefevre L, Guyonnet C, Poyart C, Canouï E, et al. Can Chatbot Artificial Intelligence Replace Infectious Diseases Physicians in the Management of Bloodstream Infections? A Prospective Cohort Study. *Clinical Infectious Diseases*. 2023 Oct 12;
32. Mermin-Bunnell K, Zhu Y, Hornback A, Damhorst G, Walker T, Robichaux C, et al. Use of Natural Language Processing of Patient-Initiated Electronic Health Record Messages to Identify Patients With COVID-19 Infection. *JAMA Netw Open*. 2023 Jul 7;6(7):e2322299.
33. Sanger PC, Granich M, Olsen-Scribner R, Jain R, Lober WB, Stapleton A, et al. Electronic Surveillance For Catheter-Associated Urinary Tract Infection Using Natural Language Processing. *AMIA Annu Symp Proc*. 2017;2017:1507–16.
34. Branch-Elliman W, Strymish J, Kudesia V, Rosen AK, Gupta K. Natural Language Processing for Real-Time Catheter-Associated Urinary Tract Infection Surveillance: Results of a Pilot Implementation Trial. *Infect Control Hosp Epidemiol*. 2015 Sep 26;36(9):1004–10.

35. Perret J, Schmid A. Application of OpenAI GPT-4 for the retrospective detection of catheter-associated urinary tract infections in a fictitious and curated patient data set. *Infect Control Hosp Epidemiol*. 2023 Sep 7;1–4.
36. Ray PP, Majumder P. AI Tackles Pandemics: ChatGPT's Game-Changing Impact on Infectious Disease Control. *Ann Biomed Eng*. 2023 Oct 18;51(10):2097–9.
37. Téllez Santoyo A, Lopera C, Ladino Vásquez A, Seguí Fernández F, Grafiá Pérez I, Chumbita M, et al. Identifying the most important data for research in the field of infectious diseases: thinking on the basis of artificial intelligence. *Revista Española de Quimioterapia*. 2023 Nov 27;36(6):592–6.
38. Feldman J, Thomas-Bachli A, Forsyth J, Patel ZH, Khan K. Development of a global infectious disease activity database using natural language processing, machine learning, and human expertise. *Journal of the American Medical Informatics Association*. 2019 Nov 1;26(11):1355–9.
39. Zhou S, Silvasstar J, Clark C, Salyers AJ, Chavez C, Bull SS. An artificially intelligent, natural language processing chatbot designed to promote COVID-19 vaccination: A proof-of-concept pilot study. *Digit Health*. 2023 Jan 5;9:205520762311556.
40. Wilhelm TI, Roos J, Kaczmarczyk R. Large Language Models for Therapy Recommendations Across 3 Clinical Specialties: Comparative Study. *J Med Internet Res*. 2023 Oct 30;25:e49324.
41. Ioannidis JPA, Lau J. Pooling Research Results: Benefits and Limitations of Meta-Analysis. *Jt Comm J Qual Improv*. 1999 Sep;25(9):462–9.



## Tables and figures

**Table 1: Summary of the included studies.**

| No. | Title                                                                                                 | Author (Ref)           | Year | Study Type               | Input data and Sample Size                                                | Model      | Disease Focus                     |
|-----|-------------------------------------------------------------------------------------------------------|------------------------|------|--------------------------|---------------------------------------------------------------------------|------------|-----------------------------------|
| 1   | Can Chatbot Artificial Intelligence Replace Infectious Diseases Physicians in Bloodstream Infections? | Maillard et al(31)     | 2023 | Prospective Cohort Study | 44 standardized reports with a management plan and features to support it | Chat GPT 4 | Bloodstream infections            |
| 2   | Application of OpenAI GPT-4 for the retrospective detection of catheter-associated urinary            | Perret and Schmid (35) | 2023 | Retrospective Analysis   | 50 fictitious patients' data                                              | Chat GPT 4 | Catheter-Associated Urinary Tract |

|   |                                                                                                                                                                                       |                         |      |                                   |                                                  |                      |                                             |
|---|---------------------------------------------------------------------------------------------------------------------------------------------------------------------------------------|-------------------------|------|-----------------------------------|--------------------------------------------------|----------------------|---------------------------------------------|
|   | tract infections in a fictitious and curated patient data set                                                                                                                         |                         |      |                                   |                                                  |                      | Infections                                  |
| 3 | Closing the Gap in Surveillance and Audit of Invasive Mold Diseases for Antifungal Stewardship Using Machine Learning                                                                 | Baggio et al (30)       | 2019 | Retrospective Observational Study | 3014 CT reports                                  | Machine learning NLP | Invasive Mold Diseases                      |
| 4 | Detecting evidence of invasive fungal infections in cytology and histopathology reports enriched with concept-level annotations                                                       | Rozova et al (29)       | 2023 | Retrospective Analysis            | 283 cytology and histopathology reports          | NLP                  | Invasive Fungal Infections                  |
| 5 | Extracting information on pneumonia in infants using natural language processing of radiology reports                                                                                 | Mendonça et al (28)     | 2005 | Retrospective Analysis            | 1277 neonates, 7928 CXR reports                  | NLP (MedLEE)         | Healthcare-associated pneumonia in neonates |
| 6 | Facilitating Surveillance of Pulmonary Invasive Mold Diseases in Patients with Haematological Malignancies by Screening Computed Tomography Reports Using Natural Language Processing | Ananda-Rajah et al (27) | 2014 | Retrospective Case-Control Study  | 147 patients, 449 CT reports                     | NLP                  | Pulmonary Invasive Mold Diseases            |
| 7 | Using Clinical Notes and Natural Language Processing for Automated HIV Risk Assessment                                                                                                | Feller et al (26)       | 2018 | Case-Control Study                | 724: 181 HIV-positive, 543 HIV-negative controls | NLP                  | HIV Risk Assessment                         |
| 8 | Leveraging machine learning                                                                                                                                                           | Boligarla               | 2023 | Retrospective                     | ~1.3 million                                     | ML models            | Lyme Disease                                |

|    |                                                                                                                                                                                                                               |                           |      |                                  |                                                    |                           |                        |
|----|-------------------------------------------------------------------------------------------------------------------------------------------------------------------------------------------------------------------------------|---------------------------|------|----------------------------------|----------------------------------------------------|---------------------------|------------------------|
|    | approaches for predicting potential Lyme disease cases and incidence rates in the United States using Twitter                                                                                                                 | et al (19)                |      | Analysis                         | tweets                                             | (BERTweet, XGboost, etc.) |                        |
| 9  | Natural Language Processing and Machine Learning for Detection of Respiratory Illness by Chest CT Imaging and Tracking of COVID-19 Pandemic in the United States                                                              | Cury et al (24)           | 2023 | Retrospective Analysis           | 450,114 CT reports                                 | NLP                       | COVID-19               |
| 10 | NLP-based identification of pneumonia cases from free-text radiological reports                                                                                                                                               | Elkin et al (23)          | 2008 | Retrospective Analysis           | 400 radiology reports                              | NLP                       | Pneumonia              |
| 11 | Toward Electronic Surveillance of Invasive Mold Diseases in Hematology-Oncology Patients: An Expert System Combining Natural Language Processing of Chest Computed Tomography Reports, Microbiology, and Antifungal Drug Data | Ananda-Rajah et al (22)   | 2017 | Retrospective Case-Control Study | 123 clinical records                               | NLP, Machine learning     | Invasive Mold Diseases |
| 12 | Use of Natural Language Processing of Patient-Initiated Electronic Health Record Messages to Identify Patients With COVID-19 Infection                                                                                        | Mermin-Bunnell et al (32) | 2023 | Retrospective Cohort Study       | 10,172 Patient-Initiated Electronic Health Records | NLP (distilBERT)          | COVID-19               |
| 13 | Validation of a Natural                                                                                                                                                                                                       | Hardjojo et               | 2018 | Retrospective                    | 1680 clinical                                      | Rule-based                | Infectious             |

|    |                                                                                                                                             |                           |      |                          |                                                                       |                         |          |
|----|---------------------------------------------------------------------------------------------------------------------------------------------|---------------------------|------|--------------------------|-----------------------------------------------------------------------|-------------------------|----------|
|    | Language Processing Algorithm for Detecting Infectious Disease Symptoms in Primary Care Electronic Medical Records in Singapore             | al (21)                   |      | Study                    | records                                                               | NLP                     | diseases |
| 14 | Natural Language Processing for Real-Time Catheter-Associated Urinary Tract Infection Surveillance: Results of a Pilot Implementation Trial | Branch-Elliman et al (34) | 2015 | Prospective Cohort Study | 43,609 patient-days                                                   | NLP-augmented algorithm | CAUTI    |
| 15 | Electronic Surveillance For Catheter-Associated Urinary Tract Infection Using Natural Language Processing                                   | Sanger et al (33)         | 2012 | Prospective Cohort Study | Training: 1421, Validation: 1567 catheterized patients' clinical data | NLP                     | CAUTI    |

- CAUTI - Catheter-Associated Urinary Tract Infections
- NLP - Natural Language Processing
- CT - Computed Tomography
- IFIs - Invasive Fungal Infections
- IMD - Invasive Mold Diseases
- EHR - Electronic Health Record
- ML - Machine Learning
- HIV - Human Immunodeficiency Virus
- PPV - Positive Predictive Value
- NPV - Negative Predictive Value
- AUC - Area Under Curve
- ROC - Receiver Operating Characteristic
- EMR - Electronic Medical Record

- distilBERT - Distilled Bidirectional Encoder Representations from Transformers
- CXR – Chest X Ray
- CT – Computer Tomography

**Table 2: Performance Metrics and Key Findings.**

| Author (Ref)           | Model          | Clinical Task                                  | Performance Metrics                            | Main Findings                                                                                         |
|------------------------|----------------|------------------------------------------------|------------------------------------------------|-------------------------------------------------------------------------------------------------------|
| Maillard et al(31)     | ChatGPT-4      | Bloodstream Infection Diagnosis and Management | Diagnostic accuracy: 59%, Empiric therapy: 64% | ChatGPT-4 had detailed responses but suboptimal and even hazardous management plans in complex cases. |
| Perret and Schmid (35) | ChatGPT-4      | CAUTI Detection                                | Sensitivity: 91%, Specificity: 92%             | High accuracy in CAUTI detection from patient data.                                                   |
| Baggio et al (30)      | NLP (ML-based) | IMD Identification from CT Reports             | Sensitivity: 91%, Specificity: 79%, AUC: 0.92  | Effective identification of IMD cases, aiding antifungal stewardship.                                 |
| Rozova et al (29)      | NLP            | IFI Diagnosis from Cytology and Histopathology | Micro-F1: 0.84 (dev), 0.83 (test)              | Efficient IFI identification using concept annotations.                                               |

|                           |                              | Reports                                          |                                                                                                                     |                                                                                       |
|---------------------------|------------------------------|--------------------------------------------------|---------------------------------------------------------------------------------------------------------------------|---------------------------------------------------------------------------------------|
| Mendonça et al (28)       | MedLEE                       | Neonatal Pneumonia Detection                     | Sensitivity: 71%, Specificity: 99%, PPV: 7.5%                                                                       | Feasible for identifying pneumonia, but low PPV due to broad definition.              |
| Ananda-Rajah et al (27)   | NLP (ML-based)               | IMD Detection in Hematological Malignancies      | Sensitivity: 91%, Specificity: 79%, AUC: 0.92                                                                       | Effective in IMD surveillance for hematological malignancies.                         |
| Feller et al (26)         | NLP                          | HIV Risk Assessment                              | F1 score: 0.74                                                                                                      | Improved HIV risk prediction incorporating clinical keywords.                         |
| Boligarla et al (19)      | BERTweet and other ML models | Lyme Disease Case Prediction                     | Accuracy and F1-score: 90%                                                                                          | Effective in identifying Lyme-related tweets, strong correlation with disease counts. |
| Cury et al (24)           | NLP                          | COVID-19 Respiratory Illness Detection           | Correlation coefficients: Viral Pneumonia ( $r^2=0.13$ ), Imaging Findings ( $r^2=0.66$ ), COVID NLP ( $r^2=0.82$ ) | High correlation with official COVID-19 case counts, early detection capability.      |
| Elkin et al (23)          | NLP                          | Pneumonia Detection from Radiological Reports    | Sensitivity: 100%, Specificity: 90.3-97.99%, PPV: 70-97.44%                                                         | High accuracy for pneumonia identification.                                           |
| Ananda-Rajah et al (22)   | NLP, ML                      | IMD Surveillance in Hematology-Oncology Patients | Specificity: 74.6%, Sensitivity: 98.4%, ROC: 92.8%                                                                  | Combined NLP and data sources for improved IMD prediction.                            |
| Mermin-Bunnell et al (32) | distilBERT                   | COVID-19 Case Classification from EHR Messages   | Macro F1: 94%, Sensitivity: 85-100%                                                                                 | High accuracy in classifying COVID-19 related EHR messages.                           |

|                           |               |                                                           |                                                                |                                                                               |
|---------------------------|---------------|-----------------------------------------------------------|----------------------------------------------------------------|-------------------------------------------------------------------------------|
| Hardjojo et al (21)       | CHESS         | Infectious Disease Symptom Detection in EMRs              | Precision: 96.0%, Recall: 93.1%                                | High precision and recall in identifying infectious disease symptoms in EMRs. |
| Branch-Elliman et al (34) | NLP-augmented | Indwelling Urinary Catheter Days and CAUTI Identification | PPV: 54.2%, Sensitivity: 65%                                   | Identified more catheter days, variation in performance between unit types.   |
| Sanger et al (33)         | NLP           | CAUTI Detection from Clinical Data                        | Sensitivity: 97.1%, Specificity: 94.5%, PPV: 66.7%, NPV: 99.6% | High sensitivity and specificity, ideal as a screening tool.                  |

- AI - Artificial Intelligence
- NLP - Natural Language Processing
- CAUTI - Catheter-Associated Urinary Tract Infections
- IMD - Invasive Mold Diseases
- IFIs - Invasive Fungal Infections
- AUC - Area Under Curve
- PPV - Positive Predictive Value
- NPV - Negative Predictive Value
- EHR - Electronic Health Record
- HIV - Human Immunodeficiency Virus
- ROC - Receiver Operating Characteristic
- CT - Computed Tomography
- IUCD - Indwelling Urinary Catheter Days

**Table 3: Limitations and Implications.**

| <b>Author (Ref)</b>    | <b>Limitations</b>                                                                        | <b>Implications</b>                                                                                                |
|------------------------|-------------------------------------------------------------------------------------------|--------------------------------------------------------------------------------------------------------------------|
| Maillard et al(31)     | A limited sample size. No systematic investigation of the influence of different prompts. | Need for AI performance enhancement in complex medical cases. ChatGPT-4's limited capability in complex decisions. |
| Perret and Schmid (35) | Idealized patient data, high CAUTI prevalence, data processing limits.                    | AI's potential in infection surveillance, need for real-world data exploration.                                    |
| Baggio et al (30)      | Single-center, retrospective nature, possible IMD underestimation.                        | NLP as a scalable tool in antifungal stewardship, leveraging radiology data.                                       |
| Rozova et al (29)      | Limited to specific report types, challenges in automated recognition.                    | Utility of NLP in IFI detection through concept-level annotations in reports.                                      |
| Mendonça et al (28)    | Broad pneumonia definition leading to low predictive value.                               | Viability of NLP and clinical rules for automated pneumonia surveillance.                                          |
| Ananda-Rajah et        | Specific patient population focus,                                                        | NLP's role in IMD surveillance in hematology,                                                                      |



|                           |                                                                          |                                                                                             |
|---------------------------|--------------------------------------------------------------------------|---------------------------------------------------------------------------------------------|
| al (27)                   | generalizability challenges.                                             | leveraging CT reports.                                                                      |
| Feller et al (26)         | Dependence on clinical data quality and completeness.                    | Improvement of HIV risk prediction using NLP, need for advanced data extraction techniques. |
| Boligarla et al (19)      | Reliance on self-reported tweets, classification challenges.             | BERTweet's reliability in Lyme disease detection via social media data.                     |
| Cury et al (24)           | Reliance on CT report data, lack of laboratory confirmation.             | NLP's early detection capability in respiratory illnesses during pandemics.                 |
| Elkin et al (23)          | Limited study scope, recognition challenges in differential diagnosis.   | Efficacy of NLP in pneumonia detection from radiological reports.                           |
| Ananda-Rajah et al (22)   | Limited to hematological malignancy patients, generalizability concerns. | Promising use of multiple data sources for IMD surveillance in hospitals.                   |
| Mermin-Bunnell et al (32) | Self-reported data reliance, classification difficulties.                | NLP's high accuracy in classifying COVID-19 cases, potential as a triage tool.              |
| Hardjojo et al (21)       | Potential misclassification, training dataset terminology reliance.      | CHESS's effectiveness in symptom identification for infectious diseases.                    |
| Branch-Elliman et al (34) | Single healthcare system focus, varying algorithm performance.           | NLP's potential in IUCDs detection, need for further evaluation in CAUTI surveillance.      |
| Sanger et al (33)         | Single-center study, small validation sample.                            | High NLP sensitivity in CAUTI detection, need for broader validation.                       |

- AI: Artificial Intelligence
- NLP: Natural Language Processing
- CAUTI: Catheter-Associated Urinary Tract Infections
- IMD: Invasive Mold Diseases
- IFIs: Invasive Fungal Infections
- AUC: Area Under Curve
- PPV: Positive Predictive Value
- NPV: Negative Predictive Value
- EHR: Electronic Health Record

- CT: Computed Tomography
- HIV: Human Immunodeficiency Virus
- IUCDs: Intrauterine Contraceptive Devices
- NHSN: National Healthcare Safety Network

**Figure 1: A Framework of AI in Language Processing.**

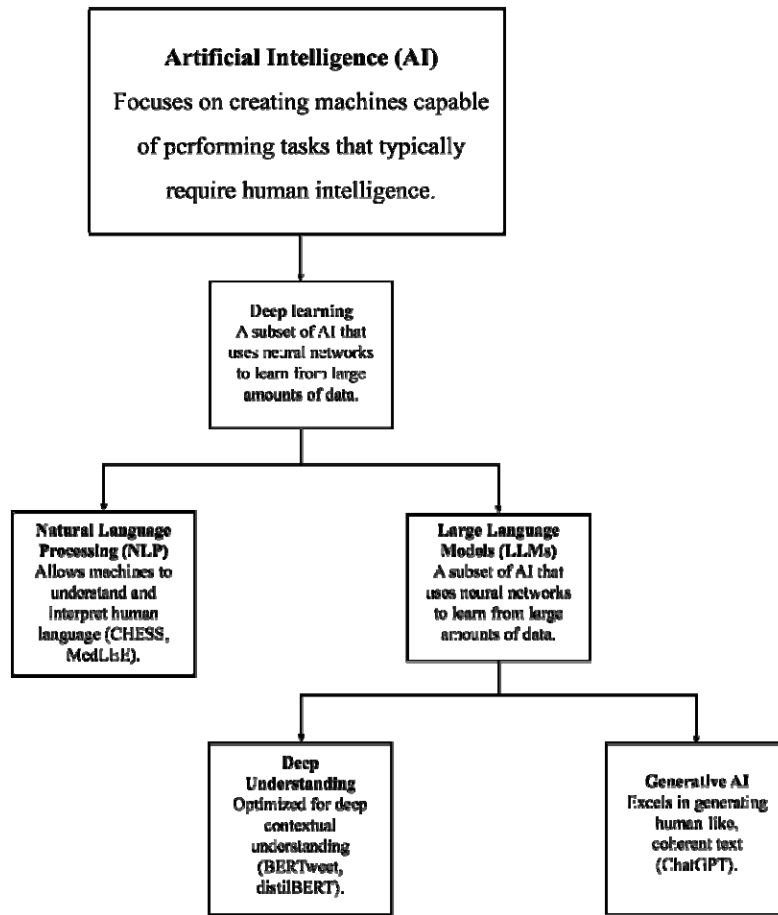

**Figure 2: Decoding Clinical Narratives: An NLP Model's Path from Text to Diagnosis.**

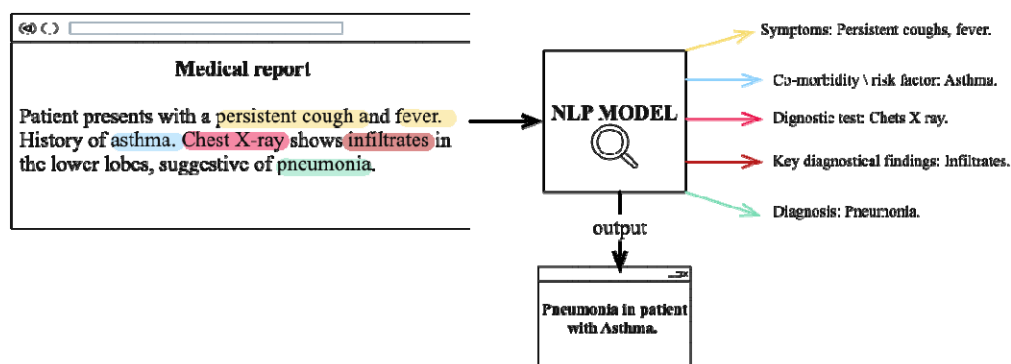

**Figure 3: PRISMA flowchart.**

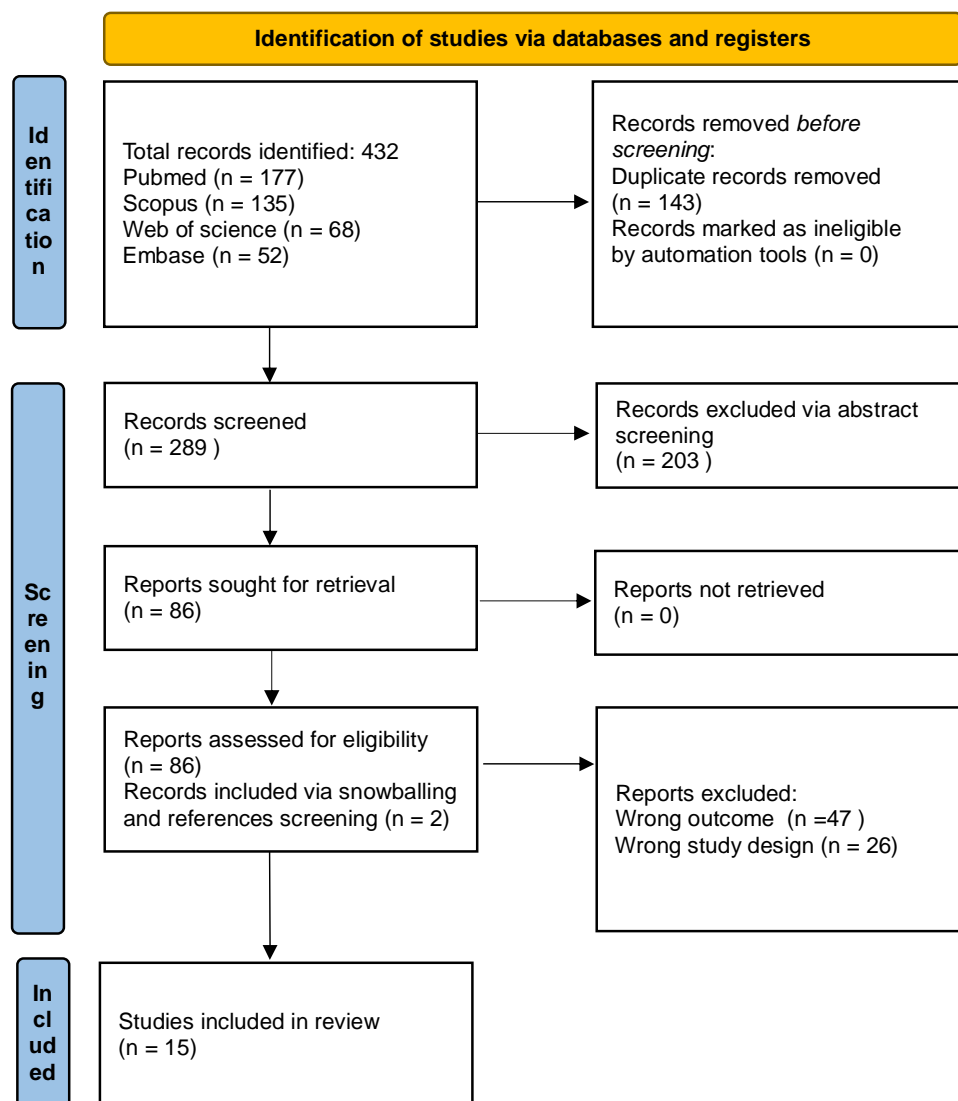

**Figure 4: Distribution of Risk of Bias Concerns Across Individual Domains.**

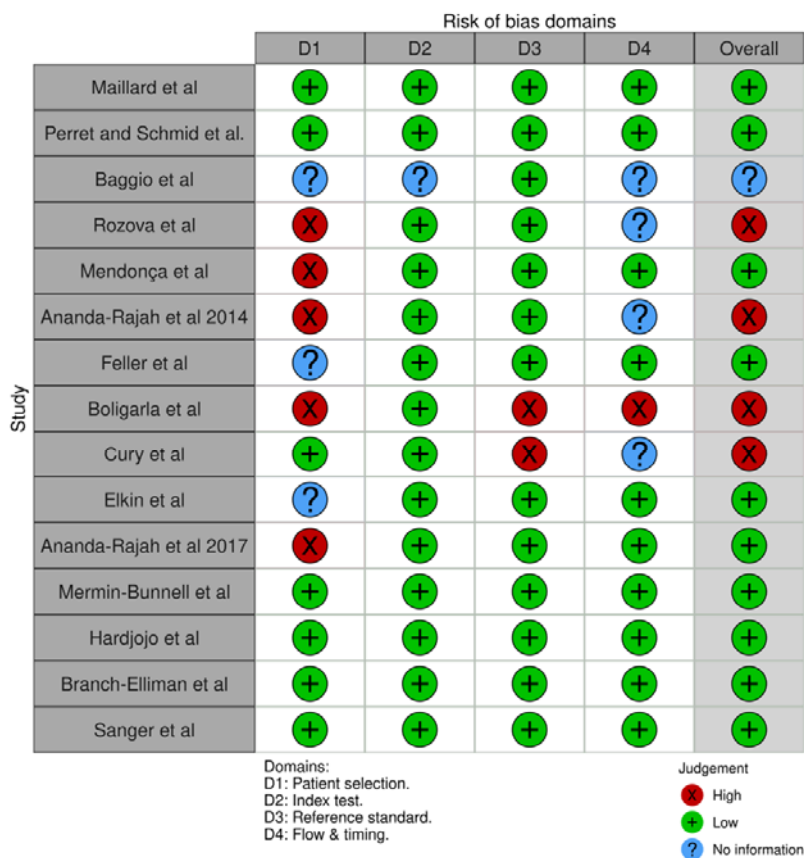

**Figure 5: Cumulative Assessment of Overall Risk of Bias Concerns Across All Included Studies.**

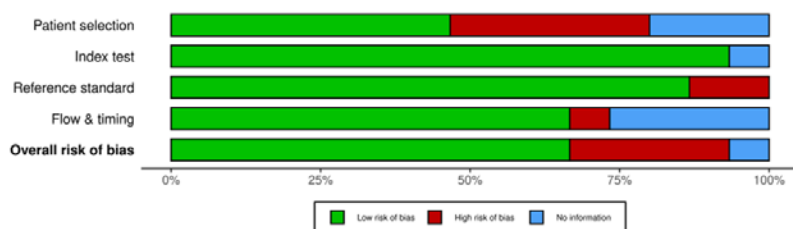

## Supplementary materials

**Appendix** – Screening Boolean strings for the different databases.

### Pubmed

("large language models" OR "LLM" OR "ChatGPT" OR "GPT-3" OR "GPT-4" OR "natural language processing" OR "NLP") AND ("infectious diseases" OR "bacterial infections" OR "viral infections" OR "fungal infections" OR "parasitic infections")

### Scopus

(TITLE-ABS-KEY("large language models" OR "LLM" OR "ChatGPT" OR "GPT-3" OR "GPT-4" OR "natural language processing" OR "NLP") AND TITLE-ABS-KEY("infectious diseases" OR "bacterial infections" OR "viral infections" OR "fungal infections" OR "parasitic infections"))

### Web of science

(TS=("large language models" OR "LLM" OR "ChatGPT" OR "GPT-3" OR "GPT-4" OR "natural language processing" OR "NLP")) AND TS=("infectious diseases" OR "bacterial infections" OR "viral infections" OR "fungal infections" OR "parasitic infections")

### Embase

('large language models':ab,ti OR 'LLM':ab,ti OR 'ChatGPT':ab,ti OR 'GPT-3':ab,ti OR 'GPT-4':ab,ti OR 'natural language processing':ab,ti OR 'NLP':ab,ti) AND ('infectious diseases':ab,ti OR 'bacterial infections':ab,ti OR 'viral infections':ab,ti OR 'fungal infections':ab,ti OR 'parasitic infections':ab,ti)
